# Supplementary material
Source: publisher figshare collection journal article supplement (https://frontiersin.figshare.com/ndownloader/files/24785408)
Supplement: Supplementary file 1 [file 24785408]

niche_breadth_scaling_coef	m_immigration	m_immigration_black_mats	nu	dispersal_kernel_slope	i_sim
4	0.009	0.05	1e-6	1e4	1
4	0.01	0.001	1e-6	1e3	2
4	0.09	0.05	1e-6	100	3
20	0.005	0.5	0.01	100	4
20	0.5	0.5	0.01	1e4	5
20	0.01	0.1	0.01	1e3	6
4	0.09	0.1	0.1	1e3	7
20	0.1	0.009	0.01	1e6	8
1	0.05	0.005	1e-5	1e4	9
4	0.009	0.05	1e-4	1e6	10
4	0.9	0.09	0.001	1e3	11
4	0.09	0.1	0.01	1e4	12
1	0.009	0.9	1e-6	1e4	13
20	0.009	0.05	1e-6	100	14
1	0.009	0.9	1e-4	1e6	15
1	0.5	0.009	1e-6	1e3	16
4	0.09	0.5	1e-4	10	17
4	0.01	0.5	0.01	1e6	18
1	0.005	0.1	1e-5	1e3	19
1	0.5	0.005	1e-4	10	20
20	0.01	0.005	0.001	1e6	21
1	0.005	0.9	0.01	100	22
4	0.9	0.009	0.001	10	23
1	0.001	0.01	1e-4	1e6	24
1	0.9	0.5	0.001	1e3	25
20	0.01	0.09	0.01	10	26
20	0.05	0.1	1e-5	100	27
4	0.9	0.5	0.1	1e6	28
4	0.05	0.005	1e-6	1e3	29
1	0.001	0.1	1e-4	100	30
20	0.001	0.01	0.1	1e3	31
1	0.009	0.5	1e-5	100	32
4	0.1	0.9	1e-4	1e3	33
4	0.05	0.009	1e-6	10	34
4	0.005	0.1	1e-4	1e6	35
1	0.9	0.1	0.1	1e5	36
4	0.05	0.5	1e-6	100	37
1	0.05	0.009	0.001	1e6	38
20	0.09	0.005	1e-6	10	39
4	0.1	0.1	1e-5	1e5	40
20	0.001	0.01	0.1	10	41
4	0.1	0.005	0.001	1e6	42
1	0.9	0.05	1e-6	10	43
4	0.05	0.1	1e-5	10	44
4	0.09	0.005	0.1	100	45
1	0.009	0.9	0.01	1e4	46
20	0.9	0.1	0.1	1e5	47
1	0.05	0.05	1e-6	1e4	48
4	0.009	0.09	1e-6	1e3	49
4	0.01	0.1	1e-6	1e6	50
4	0.005	0.5	1e-6	1e3	51
20	0.009	0.9	1e-5	1e3	52
1	0.9	0.05	1e-6	1e6	53
20	0.001	0.5	1e-5	1e5	54
4	0.05	0.05	0.01	10	55
4	0.1	0.1	0.001	100	56
4	0.09	0.1	1e-4	1e6	57
1	0.9	0.9	1e-5	100	58
4	0.9	0.001	1e-4	1e4	59
1	0.1	0.005	0.01	1e4	60
20	0.05	0.1	1e-5	1e3	61
1	0.09	0.09	0.01	100	62
1	0.09	0.05	0.1	1e6	63
1	0.01	0.9	0.1	1e5	64
1	0.1	0.01	1e-4	1e5	65
1	0.009	0.001	0.1	1e3	66
20	0.001	0.01	0.001	1e4	67
1	0.009	0.5	0.001	100	68
4	0.05	0.01	0.1	1e3	69
1	0.005	0.09	0.001	1e5	70
4	0.009	0.1	1e-4	1e3	71
4	0.005	0.001	1e-5	1e5	72
20	0.9	0.05	0.1	1e3	73
1	0.009	0.009	0.001	1e5	74
1	0.01	0.05	0.001	1e6	75
4	0.001	0.001	0.1	10	76
1	0.1	0.001	1e-6	1e5	77
1	0.9	0.1	0.1	10	78
4	0.05	0.005	1e-6	1e3	79
4	0.01	0.1	0.1	10	80
20	0.1	0.005	1e-6	1e3	81
20	0.09	0.9	1e-4	1e4	82
4	0.09	0.09	1e-5	1e5	83
20	0.05	0.01	0.01	1e5	84
1	0.1	0.009	1e-5	10	85
20	0.001	0.009	1e-4	10	86
4	0.009	0.9	0.01	100	87
4	0.09	0.005	1e-4	100	88
4	0.05	0.1	0.001	1e5	89
4	0.009	0.5	1e-6	1e6	90
4	0.005	0.1	1e-4	1e3	91
1	0.01	0.9	0.01	10	92
20	0.009	0.001	0.001	1e4	93
1	0.001	0.9	0.01	1e6	94
1	0.5	0.09	1e-4	1e5	95
20	0.9	0.9	0.001	100	96
1	0.09	0.009	0.1	1e4	97
20	0.001	0.5	0.1	10	98
1	0.05	0.05	0.001	1e4	99
20	0.5	0.5	1e-4	1e3	100
1	0.01	0.5	1e-4	1e4	101
4	0.005	0.09	1e-5	100	102
1	0.005	0.001	1e-6	1e3	103
4	0.05	0.01	0.01	1e5	104
4	0.5	0.005	1e-4	100	105
1	0.5	0.5	1e-4	1e4	106
20	0.05	0.005	0.1	1e3	107
1	0.09	0.1	1e-5	10	108
4	0.09	0.005	0.001	10	109
4	0.9	0.009	0.1	1e5	110
20	0.9	0.005	0.1	1e6	111
1	0.01	0.009	1e-5	1e4	112
1	0.01	0.005	0.01	1e3	113
1	0.1	0.01	0.1	10	114
4	0.5	0.9	0.001	1e6	115
1	0.009	0.9	1e-6	10	116
20	0.001	0.009	1e-4	100	117
4	0.1	0.1	1e-5	1e6	118
4	0.1	0.5	1e-6	100	119
4	0.005	0.001	1e-6	1e6	120
20	0.9	0.009	1e-5	1e3	121
20	0.01	0.9	0.1	10	122
20	0.01	0.09	0.01	1e5	123
20	0.01	0.001	0.001	10	124
1	0.1	0.05	1e-4	1e5	125
4	0.05	0.005	0.1	10	126
1	0.05	0.005	0.1	1e5	127
1	0.005	0.09	0.001	10	128
20	0.05	0.09	0.001	1e6	129
4	0.09	0.01	0.1	1e6	130
4	0.09	0.1	1e-4	1e6	131
20	0.5	0.001	1e-5	1e3	132
4	0.5	0.05	1e-4	1e6	133
4	0.09	0.05	1e-6	1e4	134
4	0.1	0.009	0.001	100	135
20	0.5	0.5	0.1	1e6	136
1	0.01	0.09	0.1	10	137
4	0.009	0.05	0.1	1e3	138
1	0.05	0.009	1e-5	100	139
20	0.1	0.05	1e-5	1e4	140
1	0.001	0.001	1e-6	1e6	141
1	0.9	0.09	1e-5	100	142
20	0.09	0.01	1e-6	1e4	143
1	0.9	0.5	1e-5	10	144
1	0.1	0.09	0.01	1e3	145
20	0.05	0.09	1e-4	10	146
20	0.01	0.05	0.1	1e4	147
20	0.05	0.5	0.01	1e5	148
20	0.01	0.09	1e-5	1e3	149
1	0.05	0.1	1e-6	1e5	150
20	0.01	0.001	1e-4	100	151
20	0.01	0.5	0.1	1e4	152
4	0.05	0.001	0.1	10	153
1	0.005	0.09	0.001	1e6	154
1	0.09	0.01	0.1	100	155
4	0.5	0.09	1e-5	1e5	156
1	0.9	0.009	1e-4	1e5	157
20	0.001	0.09	1e-4	1e3	158
4	0.9	0.9	1e-5	1e4	159
20	0.009	0.001	0.001	1e3	160
4	0.009	0.01	1e-4	1e6	161
1	0.5	0.09	0.001	1e4	162
4	0.5	0.9	0.001	1e4	163
4	0.001	0.05	0.001	1e5	164
1	0.9	0.9	0.001	1e5	165
4	0.005	0.9	1e-6	1e3	166
20	0.01	0.09	0.001	1e5	167
1	0.001	0.9	0.001	1e5	168
20	0.9	0.001	0.1	100	169
1	0.009	0.01	1e-5	1e5	170
20	0.1	0.001	0.1	100	171
4	0.005	0.9	1e-5	1e6	172
20	0.5	0.009	1e-6	100	173
1	0.05	0.01	1e-6	1e5	174
4	0.9	0.1	1e-5	100	175
1	0.9	0.1	0.1	100	176
1	0.09	0.005	0.001	100	177
1	0.05	0.09	0.01	1e5	178
4	0.5	0.09	1e-4	1e3	179
1	0.001	0.009	1e-6	10	180
1	0.5	0.005	1e-5	1e3	181
4	0.9	0.001	0.001	1e5	182
4	0.1	0.009	1e-5	1e4	183
4	0.005	0.5	1e-6	100	184
4	0.005	0.1	1e-5	10	185
4	0.005	0.9	1e-4	1e5	186
4	0.9	0.09	1e-5	10	187
1	0.5	0.9	1e-5	1e5	188
4	0.5	0.005	1e-5	10	189
4	0.001	0.001	1e-6	1e3	190
1	0.09	0.1	0.1	1e6	191
1	0.1	0.005	0.01	10	192
4	0.9	0.05	1e-5	100	193
20	0.1	0.001	1e-6	10	194
1	0.01	0.005	0.001	1e5	195
20	0.1	0.9	1e-4	1e3	196
20	0.009	0.009	0.01	100	197
1	0.01	0.9	1e-4	100	198
1	0.09	0.05	0.001	1e4	199
1	0.9	0.001	1e-4	1e6	200
4	0.001	0.01	0.01	1e6	201
4	0.9	0.5	1e-5	10	202
20	0.01	0.09	0.1	1e3	203
1	0.5	0.09	1e-5	10	204
1	0.05	0.009	1e-6	1e3	205
4	0.09	0.005	0.1	10	206
20	0.9	0.05	0.1	1e5	207
4	0.001	0.009	1e-6	1e6	208
1	0.005	0.1	0.001	1e4	209
1	0.001	0.009	0.1	1e5	210
1	0.05	0.1	0.01	1e6	211
4	0.9	0.1	1e-4	1e6	212
4	0.005	0.009	0.1	1e3	213
1	0.09	0.09	1e-4	100	214
4	0.5	0.05	0.01	1e4	215
4	0.01	0.01	1e-6	10	216
1	0.1	0.001	1e-6	1e4	217
1	0.001	0.001	1e-5	1e6	218
4	0.001	0.05	1e-4	1e4	219
1	0.05	0.9	0.01	100	220
1	0.009	0.1	0.001	1e6	221
1	0.01	0.001	1e-4	100	222
20	0.9	0.009	1e-6	1e5	223
4	0.001	0.09	0.01	100	224
1	0.1	0.5	1e-5	1e5	225
1	0.5	0.5	1e-6	100	226
1	0.05	0.09	0.01	1e4	227
4	0.09	0.001	1e-5	1e4	228
4	0.09	0.1	1e-5	10	229
4	0.9	0.5	0.001	100	230
20	0.09	0.5	1e-4	1e6	231
4	0.5	0.5	0.01	100	232
4	0.5	0.009	1e-5	1e5	233
20	0.001	0.09	1e-6	1e4	234
4	0.1	0.09	0.01	1e5	235
4	0.009	0.5	1e-5	1e5	236
1	0.005	0.01	0.001	100	237
20	0.5	0.005	1e-5	1e5	238
20	0.5	0.05	1e-5	100	239
20	0.5	0.01	0.001	100	240
4	0.01	0.05	0.001	1e4	241
4	0.1	0.1	0.001	1e3	242
1	0.9	0.9	0.001	1e4	243
1	0.001	0.01	1e-5	1e6	244
4	0.09	0.005	0.001	1e5	245
20	0.05	0.09	1e-6	1e4	246
4	0.01	0.5	1e-5	1e4	247
4	0.005	0.009	0.1	1e4	248
1	0.005	0.9	0.01	1e3	249
20	0.5	0.01	0.01	1e4	250
20	0.01	0.1	1e-5	100	251
4	0.009	0.05	0.1	1e5	252
4	0.05	0.001	1e-6	1e3	253
20	0.1	0.09	1e-6	100	254
20	0.09	0.09	0.1	1e6	255
20	0.005	0.001	0.1	100	256
20	0.1	0.09	1e-4	1e6	257
1	0.5	0.9	1e-6	1e3	258
1	0.05	0.1	0.01	100	259
20	0.1	0.1	1e-4	100	260
1	0.5	0.009	0.01	1e6	261
1	0.9	0.1	1e-4	100	262
1	0.5	0.5	1e-4	1e6	263
4	0.009	0.009	0.01	1e5	264
4	0.01	0.1	0.001	100	265
4	0.1	0.009	0.1	1e5	266
20	0.1	0.005	1e-5	1e3	267
20	0.001	0.09	0.1	1e5	268
20	0.09	0.9	1e-4	100	269
4	0.05	0.005	1e-6	10	270
20	0.009	0.009	1e-4	10	271
1	0.01	0.5	1e-6	1e3	272
1	0.05	0.1	1e-6	10	273
4	0.05	0.05	0.01	1e5	274
20	0.01	0.05	1e-5	10	275
4	0.09	0.09	0.01	1e4	276
20	0.5	0.001	1e-5	1e4	277
4	0.05	0.9	0.001	1e3	278
20	0.05	0.09	0.1	1e6	279
20	0.009	0.9	0.001	100	280
1	0.09	0.01	0.01	10	281
20	0.01	0.09	0.01	1e6	282
20	0.1	0.01	1e-5	1e6	283
4	0.005	0.009	1e-5	1e6	284
20	0.5	0.9	0.01	1e5	285
4	0.01	0.005	1e-5	100	286
20	0.9	0.9	0.001	1e5	287
1	0.1	0.005	0.001	10	288
4	0.001	0.05	0.1	1e6	289
4	0.5	0.5	0.001	1e6	290
20	0.01	0.05	0.1	1e5	291
1	0.9	0.09	1e-5	1e5	292
4	0.05	0.5	0.01	1e3	293
4	0.1	0.009	1e-4	10	294
4	0.005	0.9	1e-5	1e3	295
4	0.009	0.05	0.001	1e4	296
20	0.5	0.5	0.001	1e6	297
1	0.5	0.005	1e-6	10	298
20	0.1	0.001	1e-5	1e4	299
1	0.05	0.01	0.1	1e4	300
1	0.005	0.01	1e-4	1e4	301
4	0.1	0.01	1e-5	100	302
4	0.005	0.005	1e-5	1e3	303
4	0.9	0.05	0.1	1e6	304
1	0.05	0.9	0.01	1e4	305
1	0.009	0.1	0.1	1e4	306
20	0.005	0.9	0.1	1e3	307
1	0.9	0.09	1e-6	10	308
1	0.09	0.5	0.01	1e3	309
20	0.01	0.9	1e-6	10	310
20	0.001	0.05	1e-4	1e5	311
20	0.09	0.5	0.01	1e3	312
20	0.009	0.5	0.01	1e4	313
4	0.05	0.05	0.01	1e5	314
4	0.9	0.01	0.1	1e6	315
1	0.01	0.09	1e-6	1e4	316
4	0.9	0.01	1e-6	1e6	317
20	0.01	0.01	0.1	10	318
4	0.1	0.09	0.1	1e3	319
20	0.01	0.05	1e-4	1e6	320
4	0.5	0.001	1e-4	1e6	321
4	0.005	0.05	1e-4	1e6	322
1	0.9	0.1	0.001	1e5	323
1	0.9	0.005	0.1	100	324
20	0.09	0.09	0.1	10	325
20	0.1	0.5	1e-5	1e4	326
4	0.005	0.05	1e-6	100	327
4	0.005	0.05	0.01	1e6	328
1	0.01	0.9	0.1	1e3	329
1	0.1	0.5	0.01	100	330
4	0.009	0.01	0.1	100	331
1	0.005	0.001	1e-4	1e6	332
20	0.005	0.1	0.1	1e3	333
20	0.005	0.05	1e-4	10	334
1	0.001	0.001	1e-5	1e5	335
4	0.009	0.09	1e-4	1e5	336
4	0.05	0.005	0.1	1e5	337
1	0.09	0.005	1e-5	1e6	338
4	0.01	0.9	1e-4	1e4	339
1	0.001	0.9	0.1	100	340
1	0.09	0.05	0.01	100	341
1	0.005	0.01	0.1	1e3	342
4	0.001	0.09	1e-5	1e3	343
1	0.5	0.05	0.001	1e5	344
4	0.1	0.05	1e-4	100	345
1	0.05	0.001	0.01	1e6	346
4	0.09	0.05	1e-4	10	347
1	0.9	0.009	0.001	10	348
1	0.009	0.01	1e-5	1e5	349
20	0.009	0.1	1e-4	100	350
20	0.05	0.005	1e-5	1e5	351
4	0.05	0.001	0.001	100	352
4	0.01	0.5	0.1	1e5	353
1	0.01	0.009	1e-4	1e4	354
20	0.09	0.01	1e-5	100	355
20	0.05	0.5	1e-4	10	356
1	0.005	0.9	0.01	10	357
1	0.001	0.009	0.01	10	358
1	0.1	0.05	0.001	100	359
20	0.009	0.09	0.1	1e6	360
4	0.005	0.01	0.001	1e6	361
20	0.5	0.005	0.01	1e6	362
20	0.5	0.005	0.1	1e3	363
20	0.009	0.001	0.001	10	364
1	0.9	0.5	0.01	100	365
20	0.5	0.1	1e-5	10	366
1	0.01	0.01	1e-5	100	367
1	0.5	0.9	0.01	1e3	368
20	0.5	0.05	0.1	1e5	369
20	0.005	0.9	1e-6	1e5	370
20	0.05	0.5	0.001	1e3	371
4	0.5	0.005	0.001	1e6	372
1	0.001	0.5	1e-6	1e5	373
4	0.5	0.5	1e-4	1e5	374
20	0.09	0.9	1e-4	100	375
20	0.9	0.001	1e-5	1e3	376
20	0.005	0.009	1e-5	10	377
4	0.001	0.5	0.1	1e3	378
1	0.005	0.001	0.1	100	379
4	0.05	0.09	0.1	1e5	380
20	0.9	0.009	1e-6	1e6	381
20	0.001	0.5	1e-6	1e6	382
1	0.01	0.9	1e-5	1e3	383
1	0.001	0.9	0.001	1e3	384
4	0.9	0.05	0.01	100	385
1	0.05	0.5	0.01	1e4	386
1	0.009	0.1	1e-4	10	387
1	0.01	0.09	0.1	1e5	388
4	0.01	0.05	1e-5	1e5	389
1	0.09	0.05	0.01	1e5	390
4	0.05	0.009	1e-4	1e3	391
1	0.9	0.1	1e-6	1e6	392
4	0.009	0.009	0.1	1e5	393
20	0.005	0.005	0.001	1e5	394
1	0.009	0.1	1e-4	10	395
20	0.009	0.05	1e-4	1e6	396
1	0.1	0.01	0.1	10	397
20	0.1	0.1	1e-5	10	398
4	0.005	0.5	1e-5	1e6	399
20	0.5	0.9	1e-4	10	400
1	0.5	0.09	0.01	100	401
4	0.9	0.01	0.01	1e3	402
4	0.001	0.009	1e-6	100	403
20	0.001	0.9	1e-5	1e5	404
1	0.001	0.005	0.001	1e5	405
4	0.5	0.009	1e-5	1e4	406
20	0.005	0.001	1e-5	1e3	407
20	0.001	0.005	0.001	100	408
4	0.01	0.01	1e-4	1e6	409
20	0.5	0.005	0.001	1e6	410
20	0.09	0.009	1e-6	1e4	411
1	0.005	0.09	0.01	100	412
1	0.001	0.005	0.01	1e6	413
4	0.9	0.5	1e-5	1e3	414
4	0.01	0.1	0.1	1e6	415
4	0.1	0.009	0.01	1e4	416
4	0.009	0.001	1e-4	1e3	417
1	0.009	0.9	0.1	1e3	418
4	0.9	0.05	1e-5	100	419
4	0.01	0.05	1e-6	1e3	420
20	0.5	0.09	0.01	10	421
20	0.009	0.005	0.001	1e6	422
1	0.09	0.1	0.1	1e4	423
1	0.05	0.05	1e-5	1e4	424
20	0.005	0.01	0.1	100	425
1	0.1	0.5	1e-5	1e3	426
4	0.005	0.09	0.01	1e6	427
1	0.09	0.005	0.01	1e5	428
20	0.009	0.005	1e-4	10	429
20	0.09	0.005	1e-5	1e5	430
4	0.5	0.9	1e-5	1e4	431
1	0.5	0.9	1e-6	100	432
1	0.9	0.1	0.01	1e4	433
20	0.01	0.09	0.001	100	434
4	0.09	0.005	1e-6	1e4	435
4	0.5	0.9	0.01	1e5	436
4	0.005	0.09	1e-5	1e3	437
20	0.009	0.9	0.01	100	438
1	0.1	0.1	1e-5	1e6	439
1	0.05	0.5	1e-5	1e5	440
1	0.009	0.09	0.1	1e3	441
1	0.009	0.05	0.1	1e6	442
4	0.05	0.5	0.001	100	443
1	0.5	0.9	0.001	10	444
20	0.009	0.1	1e-5	100	445
1	0.005	0.001	0.1	1e6	446
4	0.05	0.09	1e-6	1e5	447
4	0.01	0.09	1e-6	1e5	448
1	0.09	0.005	0.1	10	449
4	0.09	0.009	0.01	1e4	450
20	0.05	0.05	1e-6	1e6	451
4	0.05	0.1	0.001	1e5	452
1	0.01	0.001	1e-5	100	453
20	0.9	0.5	0.001	10	454
1	0.05	0.001	1e-4	1e6	455
20	0.009	0.5	0.001	1e5	456
1	0.001	0.001	0.001	1e6	457
4	0.09	0.005	0.001	100	458
1	0.009	0.5	0.1	10	459
4	0.001	0.5	1e-4	100	460
20	0.009	0.05	0.01	1e5	461
20	0.01	0.9	0.01	1e3	462
20	0.09	0.09	0.1	1e5	463
20	0.005	0.009	0.1	1e5	464
20	0.001	0.005	0.001	100	465
20	0.05	0.01	1e-4	10	466
4	0.005	0.005	1e-4	1e4	467
1	0.009	0.9	0.001	1e3	468
4	0.05	0.009	0.01	1e5	469
4	0.009	0.1	0.1	1e6	470
20	0.01	0.005	1e-6	1e6	471
20	0.9	0.9	0.01	1e3	472
4	0.1	0.009	1e-4	100	473
20	0.001	0.05	0.01	1e6	474
4	0.01	0.09	0.001	1e5	475
20	0.1	0.001	0.001	1e5	476
20	0.05	0.9	1e-5	100	477
4	0.01	0.009	1e-4	100	478
4	0.05	0.5	0.01	100	479
20	0.009	0.9	0.1	10	480
4	0.005	0.09	1e-4	100	481
1	0.09	0.5	0.1	1e4	482
1	0.009	0.5	1e-6	10	483
1	0.005	0.09	0.01	1e4	484
20	0.01	0.09	1e-6	10	485
4	0.05	0.009	1e-5	10	486
20	0.005	0.1	1e-4	10	487
4	0.01	0.9	0.1	1e5	488
1	0.05	0.01	0.001	1e4	489
1	0.09	0.05	0.1	1e3	490
4	0.01	0.09	1e-4	1e3	491
1	0.05	0.009	1e-6	100	492
20	0.09	0.09	1e-6	1e6	493
4	0.01	0.5	1e-6	100	494
20	0.009	0.001	1e-4	1e6	495
20	0.009	0.09	0.001	10	496
20	0.01	0.9	0.01	1e5	497
20	0.005	0.005	0.001	100	498
1	0.01	0.001	0.01	1e3	499
4	0.005	0.09	1e-6	1e3	500
1	0.05	0.001	0.1	100	501
1	0.05	0.05	0.1	100	502
4	0.01	0.9	0.1	1e5	503
4	0.5	0.01	1e-5	1e4	504
1	0.005	0.05	0.001	1e6	505
20	0.5	0.5	0.01	1e5	506
20	0.05	0.005	0.001	1e5	507
1	0.005	0.001	0.01	10	508
20	0.01	0.09	0.1	10	509
4	0.9	0.09	0.1	1e5	510
1	0.09	0.001	1e-4	1e6	511
20	0.1	0.5	1e-5	100	512
20	0.009	0.09	0.1	10	513
1	0.5	0.5	0.01	10	514
4	0.09	0.1	1e-4	1e5	515
4	0.9	0.005	1e-5	1e3	516
1	0.9	0.5	0.001	1e4	517
20	0.9	0.05	1e-5	10	518
20	0.05	0.01	0.001	1e3	519
1	0.009	0.05	1e-5	1e6	520
20	0.9	0.9	1e-6	1e5	521
20	0.009	0.001	0.01	1e6	522
20	0.05	0.001	0.01	100	523
1	0.1	0.9	1e-4	1e3	524
1	0.01	0.05	1e-4	1e3	525
20	0.05	0.005	0.01	10	526
1	0.001	0.05	1e-6	100	527
1	0.005	0.001	0.01	1e6	528
4	0.001	0.1	1e-5	100	529
1	0.05	0.001	0.001	1e6	530
4	0.9	0.1	1e-5	1e4	531
4	0.1	0.9	0.01	100	532
1	0.9	0.01	1e-6	100	533
4	0.001	0.01	1e-5	10	534
1	0.01	0.1	0.01	1e5	535
4	0.005	0.5	1e-5	100	536
4	0.01	0.1	0.01	1e5	537
4	0.05	0.9	1e-5	1e4	538
1	0.001	0.05	0.1	1e4	539
4	0.09	0.5	0.01	100	540
4	0.5	0.005	1e-6	1e4	541
4	0.001	0.5	0.1	1e5	542
1	0.05	0.01	0.1	1e4	543
20	0.009	0.009	1e-5	1e3	544
4	0.01	0.1	0.01	1e4	545
20	0.5	0.5	1e-5	1e4	546
1	0.001	0.1	1e-4	1e3	547
4	0.05	0.9	0.1	1e5	548
4	0.5	0.5	0.001	10	549
4	0.009	0.1	1e-5	1e5	550
4	0.09	0.1	1e-4	1e4	551
4	0.9	0.001	1e-4	1e4	552
20	0.1	0.05	1e-6	1e3	553
4	0.01	0.9	1e-6	100	554
20	0.05	0.01	0.01	1e4	555
20	0.05	0.001	1e-5	1e6	556
4	0.5	0.01	1e-6	1e6	557
4	0.005	0.1	1e-6	1e6	558
1	0.05	0.01	0.1	1e4	559
4	0.001	0.005	1e-5	10	560
20	0.1	0.009	0.1	1e4	561
4	0.009	0.5	1e-6	10	562
1	0.09	0.005	0.001	1e6	563
1	0.05	0.05	1e-4	1e6	564
1	0.009	0.05	1e-5	1e3	565
20	0.001	0.01	0.01	1e6	566
1	0.009	0.09	1e-5	10	567
4	0.5	0.05	1e-4	1e3	568
1	0.001	0.05	0.1	1e4	569
1	0.01	0.09	1e-5	1e5	570
1	0.9	0.1	1e-6	1e6	571
1	0.9	0.09	1e-6	1e6	572
20	0.005	0.05	0.001	1e3	573
1	0.5	0.009	1e-4	10	574
4	0.005	0.09	0.1	1e3	575
20	0.5	0.1	0.01	1e5	576
1	0.01	0.005	0.001	1e5	577
4	0.009	0.9	1e-5	1e3	578
20	0.009	0.9	1e-5	100	579
1	0.001	0.005	0.001	1e3	580
4	0.5	0.001	0.001	1e4	581
1	0.001	0.1	0.1	100	582
1	0.05	0.09	1e-6	1e6	583
4	0.01	0.9	1e-4	1e3	584
1	0.1	0.01	1e-6	1e4	585
4	0.09	0.9	0.001	1e3	586
20	0.009	0.001	1e-5	100	587
1	0.005	0.01	1e-5	1e5	588
20	0.001	0.01	0.1	100	589
1	0.5	0.1	0.001	1e3	590
20	0.5	0.009	0.1	100	591
4	0.9	0.9	1e-6	1e5	592
20	0.005	0.009	1e-6	1e6	593
1	0.1	0.005	1e-5	1e5	594
4	0.5	0.09	0.01	1e6	595
1	0.009	0.05	0.01	1e6	596
1	0.09	0.01	0.1	1e3	597
20	0.5	0.001	0.01	1e5	598
1	0.001	0.09	0.001	1e5	599
4	0.05	0.5	0.1	1e5	600
4	0.05	0.09	1e-6	10	601
20	0.009	0.05	0.1	1e3	602
20	0.009	0.005	1e-4	1e3	603
20	0.009	0.009	1e-4	1e4	604
4	0.009	0.5	0.001	1e4	605
4	0.005	0.5	0.1	1e3	606
4	0.005	0.001	0.001	1e5	607
20	0.09	0.01	0.01	1e3	608
20	0.01	0.05	1e-4	1e5	609
4	0.9	0.01	1e-4	1e4	610
4	0.5	0.09	0.1	1e3	611
4	0.001	0.09	1e-6	1e4	612
4	0.05	0.001	0.01	1e4	613
1	0.9	0.001	1e-4	1e3	614
4	0.005	0.01	0.01	1e3	615
20	0.005	0.001	1e-6	1e6	616
4	0.01	0.009	1e-4	1e3	617
1	0.005	0.005	0.1	1e5	618
1	0.01	0.9	0.1	10	619
4	0.005	0.001	0.1	1e4	620
20	0.05	0.001	0.01	1e3	621
4	0.1	0.009	1e-5	1e3	622
4	0.001	0.1	1e-5	1e5	623
20	0.005	0.05	1e-5	10	624
1	0.05	0.01	0.001	10	625
4	0.005	0.9	0.001	1e5	626
1	0.005	0.9	0.001	1e4	627
20	0.05	0.1	1e-6	1e3	628
20	0.5	0.9	1e-6	1e4	629
4	0.09	0.1	0.001	1e4	630
1	0.01	0.009	1e-5	10	631
1	0.001	0.9	0.001	1e5	632
1	0.01	0.5	0.001	10	633
4	0.009	0.01	1e-6	100	634
4	0.001	0.09	0.01	1e6	635
20	0.5	0.9	1e-5	1e3	636
4	0.9	0.1	1e-5	1e5	637
4	0.005	0.009	0.1	1e3	638
4	0.09	0.5	1e-4	100	639
4	0.009	0.9	1e-4	1e5	640
1	0.09	0.01	0.01	1e3	641
20	0.09	0.001	0.1	1e5	642
4	0.009	0.001	1e-4	1e3	643
4	0.01	0.005	0.01	1e6	644
1	0.05	0.9	0.001	100	645
1	0.005	0.009	1e-4	1e4	646
1	0.005	0.005	0.1	1e4	647
20	0.9	0.005	1e-6	1e4	648
20	0.5	0.005	1e-4	1e4	649
1	0.05	0.5	0.001	1e5	650
4	0.09	0.5	1e-6	1e4	651
20	0.01	0.009	0.01	1e6	652
4	0.5	0.5	0.01	100	653
20	0.009	0.05	0.001	100	654
1	0.1	0.005	0.01	1e3	655
20	0.01	0.005	0.01	1e3	656
1	0.1	0.5	1e-5	1e3	657
4	0.001	0.009	1e-5	1e5	658
1	0.001	0.9	0.1	1e5	659
1	0.05	0.5	0.001	1e6	660
4	0.5	0.5	0.1	100	661
4	0.001	0.01	1e-5	1e6	662
20	0.005	0.09	1e-6	1e3	663
1	0.001	0.009	0.1	100	664
4	0.05	0.05	0.01	100	665
4	0.01	0.09	0.01	1e4	666
1	0.9	0.5	0.1	1e5	667
4	0.01	0.05	0.001	100	668
20	0.9	0.9	1e-5	10	669
4	0.05	0.9	0.01	1e4	670
4	0.9	0.005	1e-4	1e4	671
4	0.9	0.001	0.1	1e5	672
20	0.01	0.09	0.1	10	673
1	0.09	0.1	0.001	100	674
1	0.09	0.09	1e-4	100	675
1	0.9	0.1	1e-6	10	676
1	0.001	0.001	1e-4	100	677
1	0.009	0.1	0.01	100	678
4	0.001	0.1	1e-6	1e5	679
4	0.9	0.01	1e-6	10	680
4	0.05	0.005	1e-4	1e3	681
1	0.05	0.009	1e-4	10	682
20	0.09	0.1	0.001	1e3	683
20	0.01	0.09	0.1	10	684
4	0.9	0.01	1e-5	1e3	685
20	0.01	0.009	0.01	1e6	686
4	0.5	0.005	1e-5	10	687
1	0.005	0.1	0.01	10	688
4	0.9	0.1	1e-4	100	689
4	0.005	0.005	0.01	10	690
20	0.01	0.01	1e-4	1e5	691
20	0.09	0.005	1e-4	100	692
20	0.9	0.9	0.01	1e6	693
20	0.005	0.009	0.01	1e3	694
4	0.009	0.09	1e-5	10	695
1	0.09	0.001	1e-5	1e5	696
4	0.001	0.01	0.01	1e6	697
1	0.001	0.1	1e-6	1e5	698
4	0.9	0.05	0.001	1e5	699
1	0.01	0.05	1e-5	1e5	700
4	0.001	0.1	0.001	1e3	701
4	0.09	0.09	1e-5	1e4	702
1	0.5	0.9	1e-6	100	703
4	0.001	0.9	1e-4	100	704
4	0.001	0.5	1e-6	100	705
20	0.01	0.005	0.001	10	706
1	0.9	0.1	0.1	1e5	707
1	0.01	0.5	1e-5	100	708
1	0.009	0.01	1e-5	1e3	709
20	0.01	0.05	0.001	1e6	710
20	0.001	0.009	1e-5	1e3	711
4	0.009	0.9	1e-4	10	712
20	0.09	0.9	0.001	1e6	713
1	0.9	0.005	0.1	1e4	714
1	0.009	0.9	1e-6	1e4	715
1	0.1	0.005	0.001	10	716
20	0.01	0.5	0.001	1e6	717
1	0.5	0.1	0.001	1e4	718
4	0.009	0.01	1e-4	1e4	719
20	0.9	0.1	1e-4	1e4	720
4	0.05	0.1	0.01	1e6	721
20	0.09	0.009	0.1	1e4	722
1	0.1	0.001	1e-6	1e6	723
4	0.001	0.05	1e-6	1e6	724
4	0.005	0.1	1e-5	1e6	725
4	0.01	0.5	1e-6	1e5	726
4	0.001	0.001	1e-5	100	727
20	0.05	0.01	1e-5	1e6	728
4	0.9	0.09	0.01	1e6	729
20	0.09	0.005	1e-4	1e6	730
20	0.001	0.9	0.001	1e3	731
4	0.001	0.9	1e-6	1e5	732
20	0.9	0.005	0.01	1e5	733
20	0.005	0.009	1e-4	1e5	734
4	0.009	0.5	0.001	1e5	735
20	0.005	0.05	0.01	1e3	736
20	0.09	0.009	0.1	1e4	737
4	0.5	0.05	0.001	10	738
20	0.01	0.01	1e-6	1e3	739
4	0.9	0.005	0.01	1e4	740
1	0.1	0.05	1e-4	1e3	741
20	0.9	0.5	1e-4	1e4	742
4	0.09	0.01	1e-6	1e5	743
20	0.1	0.001	1e-6	1e3	744
20	0.005	0.1	1e-6	1e4	745
1	0.01	0.009	0.001	100	746
1	0.09	0.5	1e-6	1e5	747
20	0.5	0.009	0.01	1e3	748
1	0.01	0.005	1e-5	1e3	749
4	0.9	0.01	1e-4	1e4	750
4	0.1	0.05	0.1	1e5	751
4	0.001	0.001	0.01	100	752
1	0.009	0.09	0.001	1e5	753
4	0.1	0.05	0.1	1e6	754
1	0.05	0.005	1e-4	1e5	755
20	0.1	0.1	1e-6	1e5	756
20	0.9	0.005	1e-5	1e6	757
1	0.05	0.09	0.1	10	758
1	0.01	0.05	1e-6	1e6	759
1	0.005	0.05	1e-4	10	760
4	0.009	0.09	0.001	1e4	761
20	0.5	0.09	0.1	1e3	762
4	0.09	0.009	0.1	1e4	763
20	0.01	0.09	0.01	1e3	764
20	0.05	0.001	0.01	1e5	765
1	0.1	0.01	1e-4	1e4	766
4	0.005	0.005	0.001	100	767
20	0.001	0.09	1e-4	1e5	768
20	0.009	0.001	0.001	1e4	769
1	0.9	0.001	0.001	1e5	770
20	0.9	0.05	1e-6	1e5	771
20	0.005	0.09	1e-4	100	772
4	0.9	0.9	1e-5	10	773
4	0.05	0.9	0.1	1e5	774
1	0.05	0.001	1e-5	100	775
20	0.009	0.001	0.1	1e3	776
4	0.009	0.009	0.01	10	777
4	0.9	0.009	1e-4	1e5	778
20	0.5	0.001	0.001	100	779
20	0.005	0.09	1e-5	1e5	780
1	0.05	0.09	1e-6	1e3	781
4	0.005	0.09	1e-4	1e3	782
20	0.01	0.009	0.001	10	783
20	0.009	0.09	0.01	10	784
4	0.5	0.009	1e-6	1e3	785
4	0.001	0.09	0.01	1e6	786
4	0.1	0.05	0.001	100	787
4	0.09	0.5	1e-6	1e5	788
4	0.05	0.05	1e-4	1e5	789
4	0.009	0.009	0.01	100	790
20	0.1	0.005	0.001	1e5	791
20	0.005	0.005	1e-6	10	792
20	0.05	0.9	0.001	100	793
1	0.5	0.1	1e-6	1e3	794
20	0.009	0.5	1e-5	100	795
1	0.01	0.009	0.001	1e4	796
1	0.9	0.05	0.01	1e6	797
20	0.001	0.1	0.1	1e4	798
20	0.001	0.9	0.001	1e6	799
4	0.001	0.001	0.01	1e6	800
4	0.05	0.001	0.1	100	801
1	0.5	0.005	0.01	1e6	802
1	0.009	0.01	0.1	1e5	803
4	0.9	0.005	0.01	100	804
4	0.009	0.9	0.001	1e5	805
20	0.09	0.1	0.01	1e6	806
4	0.05	0.001	1e-6	1e5	807
4	0.9	0.005	1e-5	1e5	808
20	0.005	0.001	1e-4	10	809
1	0.01	0.001	1e-5	10	810
20	0.1	0.01	0.1	100	811
1	0.09	0.09	0.001	1e5	812
20	0.005	0.09	1e-6	1e4	813
1	0.09	0.09	0.001	1e4	814
1	0.9	0.005	1e-6	1e6	815
1	0.05	0.009	0.1	1e4	816
4	0.009	0.01	0.1	10	817
4	0.005	0.01	1e-6	1e5	818
20	0.5	0.001	1e-4	100	819
20	0.001	0.05	1e-5	100	820
20	0.09	0.09	0.001	10	821
4	0.001	0.05	0.01	1e4	822
1	0.001	0.5	0.01	1e4	823
1	0.009	0.005	1e-4	10	824
20	0.9	0.01	1e-4	1e4	825
20	0.9	0.9	0.001	1e4	826
4	0.9	0.9	0.01	1e5	827
4	0.09	0.009	1e-6	1e5	828
1	0.01	0.009	0.1	1e6	829
4	0.001	0.1	0.1	10	830
1	0.5	0.09	1e-6	1e5	831
20	0.09	0.005	1e-5	1e4	832
4	0.1	0.005	0.001	1e3	833
20	0.001	0.5	0.01	100	834
20	0.5	0.05	0.1	1e6	835
1	0.001	0.09	0.001	1e3	836
20	0.001	0.05	1e-5	1e4	837
20	0.001	0.005	1e-4	1e3	838
4	0.001	0.005	0.1	1e4	839
1	0.1	0.09	1e-6	1e3	840
4	0.001	0.09	0.001	10	841
1	0.1	0.5	1e-4	100	842
4	0.5	0.5	1e-4	1e6	843
1	0.01	0.5	0.001	1e6	844
20	0.1	0.1	1e-6	1e3	845
20	0.5	0.1	1e-4	1e5	846
1	0.9	0.5	0.1	1e3	847
4	0.1	0.09	1e-6	1e6	848
4	0.005	0.01	0.1	1e6	849
4	0.005	0.1	1e-6	1e3	850
20	0.005	0.01	1e-4	10	851
1	0.9	0.05	1e-4	100	852
20	0.1	0.5	0.001	1e5	853
4	0.1	0.001	0.001	1e5	854
4	0.005	0.005	1e-6	1e5	855
1	0.009	0.009	1e-5	1e3	856
1	0.01	0.05	1e-5	1e5	857
4	0.05	0.009	0.001	1e4	858
1	0.01	0.009	1e-5	100	859
20	0.09	0.009	1e-5	1e4	860
1	0.5	0.5	1e-5	1e3	861
20	0.001	0.001	1e-4	1e3	862
1	0.005	0.009	1e-5	10	863
1	0.01	0.009	0.1	1e4	864
4	0.09	0.01	1e-5	1e6	865
20	0.5	0.1	0.001	1e5	866
20	0.5	0.005	1e-5	1e5	867
1	0.05	0.001	1e-5	10	868
1	0.09	0.05	1e-4	1e6	869
1	0.005	0.009	1e-4	1e6	870
20	0.9	0.5	1e-5	100	871
1	0.001	0.005	0.01	1e5	872
4	0.05	0.5	1e-6	100	873
20	0.05	0.009	1e-6	1e3	874
1	0.01	0.009	0.01	1e6	875
1	0.005	0.01	1e-5	1e5	876
20	0.09	0.9	0.001	1e4	877
1	0.05	0.05	0.1	1e4	878
20	0.005	0.1	0.01	1e6	879
20	0.005	0.9	1e-4	10	880
4	0.1	0.009	0.1	10	881
4	0.001	0.1	1e-5	1e5	882
1	0.9	0.5	0.01	1e4	883
1	0.9	0.009	0.001	1e4	884
1	0.9	0.01	1e-5	1e3	885
4	0.5	0.9	1e-5	1e6	886
1	0.005	0.5	1e-6	1e3	887
1	0.5	0.05	1e-6	10	888
20	0.005	0.5	1e-4	1e4	889
1	0.05	0.09	0.1	1e6	890
4	0.01	0.01	0.001	1e3	891
20	0.09	0.5	0.01	1e4	892
1	0.05	0.9	1e-5	1e6	893
20	0.09	0.01	0.01	10	894
1	0.09	0.1	1e-4	1e5	895
20	0.01	0.009	1e-4	1e3	896
4	0.001	0.1	0.001	1e4	897
4	0.5	0.005	1e-6	1e4	898
1	0.01	0.01	1e-4	1e3	899
1	0.9	0.9	0.001	1e5	900
1	0.5	0.005	1e-5	1e5	901
4	0.09	0.05	0.1	1e6	902
20	0.5	0.01	0.01	1e3	903
1	0.05	0.005	0.01	1e5	904
20	0.9	0.9	1e-6	1e6	905
20	0.005	0.005	0.01	1e3	906
1	0.1	0.005	1e-4	10	907
20	0.05	0.05	0.001	1e4	908
20	0.005	0.05	0.1	1e3	909
20	0.9	0.001	1e-4	1e3	910
20	0.05	0.5	1e-6	1e6	911
20	0.1	0.005	0.01	1e5	912
20	0.09	0.09	1e-6	10	913
1	0.001	0.005	0.1	1e4	914
4	0.1	0.5	0.001	1e3	915
1	0.01	0.01	1e-6	1e3	916
4	0.5	0.01	1e-4	10	917
20	0.5	0.001	0.01	1e4	918
20	0.1	0.005	0.1	1e4	919
20	0.09	0.001	1e-4	1e3	920
1	0.001	0.1	0.01	1e3	921
4	0.09	0.01	1e-5	1e5	922
1	0.5	0.01	1e-5	1e4	923
4	0.9	0.1	0.001	10	924
1	0.9	0.05	0.1	1e4	925
20	0.09	0.005	0.001	100	926
4	0.5	0.5	1e-6	10	927
4	0.001	0.005	1e-5	100	928
4	0.005	0.9	1e-4	100	929
20	0.005	0.09	0.001	1e6	930
20	0.009	0.009	1e-5	10	931
1	0.09	0.01	0.001	1e6	932
20	0.05	0.5	0.1	100	933
1	0.01	0.1	0.1	1e6	934
20	0.005	0.9	0.01	100	935
20	0.5	0.05	1e-5	1e5	936
20	0.001	0.5	0.01	1e4	937
4	0.1	0.005	1e-6	1e4	938
20	0.9	0.09	0.01	1e6	939
1	0.09	0.9	1e-4	10	940
20	0.009	0.5	1e-4	1e6	941
4	0.5	0.005	1e-4	10	942
1	0.1	0.009	0.001	1e5	943
4	0.1	0.009	0.01	1e4	944
20	0.1	0.5	0.001	1e4	945
1	0.005	0.001	1e-4	1e4	946
20	0.01	0.09	1e-6	1e5	947
20	0.005	0.001	0.01	1e3	948
4	0.05	0.05	0.001	1e3	949
4	0.05	0.5	0.01	10	950
1	0.001	0.009	1e-6	1e5	951
20	0.5	0.005	0.01	10	952
20	0.09	0.9	1e-4	100	953
20	0.01	0.9	0.001	1e5	954
4	0.9	0.05	0.1	10	955
4	0.009	0.1	0.1	1e4	956
4	0.01	0.005	0.1	1e3	957
1	0.009	0.5	0.001	1e6	958
20	0.09	0.005	0.1	10	959
20	0.01	0.01	0.1	100	960
20	0.005	0.005	0.001	1e4	961
20	0.001	0.01	1e-4	1e3	962
20	0.5	0.01	0.01	1e6	963
1	0.009	0.01	0.001	1e4	964
1	0.1	0.9	1e-5	1e3	965
20	0.09	0.1	0.001	100	966
1	0.005	0.9	0.1	1e6	967
4	0.1	0.001	0.01	10	968
20	0.09	0.1	1e-5	1e3	969
20	0.9	0.05	0.01	1e5	970
1	0.009	0.009	1e-6	1e4	971
4	0.9	0.1	0.001	1e3	972
4	0.5	0.001	1e-4	1e5	973
20	0.009	0.5	1e-6	1e4	974
4	0.005	0.9	1e-6	100	975
20	0.05	0.5	1e-6	1e3	976
20	0.05	0.1	0.1	1e5	977
20	0.09	0.001	0.001	10	978
1	0.1	0.1	1e-6	1e6	979
20	0.001	0.09	0.1	1e5	980
4	0.1	0.09	0.01	10	981
4	0.09	0.1	0.1	1e5	982
4	0.009	0.9	0.01	1e6	983
4	0.09	0.009	0.1	1e4	984
20	0.9	0.5	0.01	1e5	985
1	0.1	0.9	0.001	10	986
4	0.9	0.01	0.01	1e6	987
4	0.5	0.09	1e-6	10	988
4	0.9	0.1	1e-6	1e5	989
20	0.001	0.9	0.01	1e3	990
1	0.001	0.01	1e-4	1e4	991
4	0.09	0.001	0.001	1e4	992
20	0.01	0.001	0.01	100	993
1	0.001	0.5	0.01	1e3	994
4	0.01	0.1	0.001	1e4	995
20	0.009	0.05	0.1	1e5	996
20	0.005	0.005	0.001	1e5	997
1	0.01	0.5	0.01	1e5	998
4	0.001	0.1	0.001	1e5	999
1	0.09	0.01	0.01	100	1000
20	0.01	0.5	1e-6	100	1001
4	0.09	0.9	1e-4	1e6	1002
4	0.005	0.09	1e-4	100	1003
1	0.5	0.01	1e-6	100	1004
4	0.005	0.01	0.001	1e5	1005
1	0.5	0.01	1e-5	1e4	1006
4	0.05	0.001	0.1	1e3	1007
1	0.09	0.001	0.01	10	1008
20	0.005	0.009	1e-6	100	1009
20	0.01	0.9	1e-5	1e3	1010
1	0.001	0.005	0.1	1e3	1011
1	0.5	0.1	1e-4	10	1012
4	0.05	0.005	1e-4	1e5	1013
1	0.01	0.005	0.01	100	1014
20	0.01	0.001	0.001	1e6	1015
4	0.9	0.1	1e-5	1e3	1016
1	0.5	0.1	1e-5	1e4	1017
20	0.9	0.09	1e-4	1e4	1018
4	0.005	0.9	1e-6	1e5	1019
1	0.01	0.001	0.001	1e6	1020
1	0.009	0.5	0.01	10	1021
1	0.9	0.001	0.01	1e6	1022
20	0.5	0.5	0.001	1e6	1023
4	0.005	0.005	0.01	1e5	1024
20	0.001	0.5	0.1	100	1025
1	0.05	0.1	0.01	1e6	1026
1	0.5	0.001	1e-6	1e6	1027
4	0.9	0.09	1e-5	1e6	1028
20	0.1	0.5	0.01	1e6	1029
20	0.009	0.5	0.001	10	1030
4	0.05	0.9	1e-4	1e6	1031
4	0.5	0.001	0.1	100	1032
1	0.5	0.005	1e-5	1e5	1033
4	0.005	0.01	1e-4	1e3	1034
4	0.5	0.5	0.01	100	1035
1	0.001	0.05	1e-4	10	1036
1	0.05	0.1	1e-5	1e5	1037
4	0.5	0.5	1e-4	1e5	1038
4	0.1	0.05	1e-4	1e3	1039
4	0.001	0.09	1e-5	100	1040
1	0.01	0.1	0.1	1e4	1041
1	0.05	0.001	0.01	1e5	1042
4	0.005	0.009	0.01	1e4	1043
4	0.005	0.05	1e-5	1e3	1044
20	0.005	0.001	1e-4	1e5	1045
4	0.01	0.09	0.01	1e6	1046
4	0.5	0.09	1e-6	100	1047
1	0.1	0.09	1e-6	100	1048
20	0.5	0.1	0.001	1e5	1049
1	0.05	0.9	1e-6	1e6	1050
4	0.5	0.1	0.1	1e3	1051
4	0.001	0.5	1e-4	1e5	1052
20	0.005	0.001	1e-4	10	1053
20	0.001	0.005	0.001	1e4	1054
1	0.05	0.5	0.1	100	1055
1	0.01	0.1	0.1	1e4	1056
20	0.009	0.9	1e-6	100	1057
4	0.005	0.09	0.001	1e6	1058
1	0.09	0.1	1e-4	1e5	1059
1	0.01	0.05	0.001	1e5	1060
1	0.005	0.001	0.01	10	1061
20	0.1	0.009	1e-5	1e4	1062
1	0.5	0.5	1e-5	1e6	1063
20	0.009	0.005	0.1	100	1064
1	0.9	0.005	1e-6	1e3	1065
20	0.5	0.09	0.001	10	1066
20	0.1	0.09	1e-6	100	1067
4	0.5	0.009	1e-4	1e6	1068
20	0.005	0.5	1e-4	1e5	1069
1	0.1	0.1	0.01	1e3	1070
20	0.1	0.5	1e-6	1e6	1071
4	0.09	0.01	0.001	1e5	1072
1	0.01	0.05	0.01	1e6	1073
1	0.01	0.001	1e-6	1e3	1074
4	0.9	0.01	0.001	1e4	1075
4	0.9	0.005	1e-6	10	1076
20	0.01	0.09	0.01	1e6	1077
20	0.005	0.005	0.1	1e3	1078
20	0.001	0.5	0.01	1e3	1079
4	0.05	0.009	1e-4	10	1080
20	0.09	0.009	0.01	1e3	1081
1	0.09	0.001	1e-6	100	1082
4	0.1	0.5	0.1	10	1083
4	0.5	0.005	0.01	1e3	1084
1	0.09	0.01	1e-5	1e3	1085
1	0.9	0.009	1e-6	1e4	1086
4	0.005	0.09	0.001	100	1087
4	0.05	0.9	0.001	1e4	1088
4	0.001	0.001	0.1	100	1089
20	0.09	0.1	1e-4	1e4	1090
1	0.005	0.1	1e-5	100	1091
1	0.001	0.01	0.1	1e6	1092
20	0.009	0.9	1e-4	1e4	1093
20	0.9	0.1	0.1	10	1094
1	0.1	0.09	1e-6	1e3	1095
20	0.1	0.5	1e-5	1e3	1096
4	0.009	0.1	0.1	1e5	1097
4	0.1	0.1	1e-5	1e3	1098
20	0.001	0.1	1e-6	1e4	1099
20	0.9	0.05	0.01	1e4	1100
20	0.01	0.009	0.1	100	1101
20	0.09	0.01	0.01	1e3	1102
4	0.1	0.9	1e-5	1e3	1103
20	0.001	0.09	0.001	1e3	1104
20	0.09	0.05	1e-6	10	1105
20	0.05	0.1	1e-5	1e6	1106
20	0.9	0.05	0.001	100	1107
4	0.09	0.5	1e-6	1e6	1108
1	0.1	0.009	0.01	1e4	1109
4	0.001	0.1	0.01	1e5	1110
4	0.5	0.01	0.001	1e4	1111
20	0.005	0.5	0.001	1e6	1112
20	0.01	0.001	1e-6	1e5	1113
1	0.005	0.09	0.1	100	1114
1	0.09	0.05	0.01	10	1115
1	0.09	0.05	0.01	1e5	1116
4	0.9	0.09	1e-4	1e3	1117
4	0.05	0.5	0.1	1e3	1118
4	0.09	0.005	1e-5	10	1119
4	0.9	0.5	0.1	1e6	1120
4	0.5	0.09	0.01	1e6	1121
20	0.05	0.005	1e-5	1e3	1122
4	0.1	0.005	0.01	10	1123
4	0.01	0.01	0.001	1e6	1124
1	0.001	0.05	1e-4	1e4	1125
1	0.5	0.009	1e-4	10	1126
4	0.05	0.5	1e-4	1e3	1127
1	0.01	0.001	1e-4	100	1128
4	0.001	0.05	0.001	1e3	1129
1	0.5	0.5	1e-4	1e5	1130
1	0.1	0.005	0.1	1e4	1131
1	0.05	0.5	0.1	1e4	1132
1	0.001	0.1	1e-4	100	1133
1	0.9	0.05	0.001	10	1134
4	0.005	0.1	1e-5	1e5	1135
1	0.005	0.09	1e-6	1e4	1136
4	0.09	0.05	0.1	1e3	1137
4	0.09	0.01	0.001	1e6	1138
4	0.1	0.9	0.1	1e4	1139
1	0.005	0.5	1e-4	1e6	1140
1	0.009	0.01	0.1	10	1141
20	0.1	0.1	0.001	100	1142
4	0.009	0.9	1e-6	1e3	1143
1	0.005	0.09	1e-4	10	1144
1	0.009	0.009	0.1	100	1145
20	0.1	0.001	1e-4	10	1146
20	0.01	0.005	0.1	1e5	1147
4	0.9	0.005	1e-5	1e4	1148
20	0.1	0.09	1e-6	1e4	1149
4	0.009	0.009	0.001	1e4	1150
20	0.05	0.001	1e-4	1e3	1151
1	0.5	0.001	1e-5	100	1152
20	0.01	0.05	1e-5	1e3	1153
1	0.9	0.001	0.01	1e5	1154
4	0.009	0.005	0.01	1e3	1155
1	0.5	0.001	0.001	100	1156
4	0.1	0.01	1e-4	1e6	1157
4	0.9	0.9	1e-5	100	1158
20	0.5	0.5	1e-4	1e4	1159
1	0.1	0.9	0.01	1e3	1160
20	0.5	0.9	0.01	10	1161
1	0.009	0.1	1e-6	1e5	1162
4	0.005	0.01	1e-6	1e5	1163
1	0.001	0.01	1e-4	1e5	1164
20	0.05	0.05	1e-4	10	1165
1	0.5	0.01	0.1	10	1166
1	0.01	0.001	1e-4	1e3	1167
1	0.09	0.009	1e-6	1e3	1168
4	0.009	0.1	1e-4	1e6	1169
1	0.09	0.9	1e-5	10	1170
20	0.009	0.01	1e-5	1e3	1171
20	0.005	0.01	1e-5	1e5	1172
4	0.01	0.09	1e-5	10	1173
20	0.009	0.001	1e-6	1e4	1174
4	0.5	0.005	1e-4	1e5	1175
1	0.005	0.5	1e-5	10	1176
4	0.05	0.05	1e-6	1e3	1177
20	0.5	0.09	0.1	1e3	1178
20	0.9	0.5	0.001	1e6	1179
1	0.005	0.009	1e-4	100	1180
4	0.001	0.09	0.01	1e4	1181
20	0.09	0.9	1e-5	1e4	1182
4	0.001	0.001	0.1	10	1183
20	0.009	0.1	1e-4	1e3	1184
1	0.9	0.005	1e-6	100	1185
4	0.005	0.001	1e-5	1e5	1186
4	0.5	0.9	0.001	1e3	1187
20	0.01	0.009	1e-6	1e3	1188
1	0.005	0.1	1e-5	1e5	1189
4	0.1	0.005	0.01	1e6	1190
4	0.1	0.009	1e-4	1e5	1191
4	0.009	0.05	0.01	1e5	1192
20	0.01	0.01	0.001	1e5	1193
1	0.005	0.5	1e-6	1e4	1194
1	0.001	0.001	0.1	10	1195
20	0.001	0.05	1e-4	100	1196
4	0.05	0.1	1e-4	1e5	1197
20	0.1	0.005	1e-5	100	1198
4	0.9	0.009	1e-5	1e5	1199
1	0.1	0.001	0.001	1e3	1200
4	0.09	0.5	0.1	1e6	1201
4	0.009	0.05	1e-5	1e6	1202
4	0.009	0.5	0.1	1e6	1203
1	0.001	0.009	1e-4	1e5	1204
20	0.009	0.5	1e-6	1e3	1205
4	0.001	0.5	0.001	100	1206
4	0.05	0.05	0.01	1e5	1207
4	0.09	0.9	1e-4	1e6	1208
20	0.1	0.9	0.01	100	1209
1	0.001	0.01	0.01	100	1210
20	0.05	0.01	0.001	1e6	1211
1	0.5	0.01	1e-6	1e6	1212
20	0.001	0.09	1e-6	1e4	1213
1	0.9	0.9	0.001	1e4	1214
1	0.001	0.5	1e-5	1e5	1215
1	0.01	0.9	1e-6	1e4	1216
20	0.09	0.9	1e-4	10	1217
20	0.1	0.005	0.1	1e4	1218
4	0.005	0.09	1e-5	1e5	1219
4	0.05	0.5	0.01	1e6	1220
1	0.005	0.1	1e-6	1e4	1221
4	0.05	0.05	0.001	1e4	1222
4	0.01	0.5	0.01	1e5	1223
20	0.01	0.1	1e-6	1e5	1224
4	0.1	0.09	0.1	1e4	1225
20	0.001	0.01	1e-6	100	1226
20	0.9	0.1	1e-6	100	1227
4	0.01	0.009	1e-4	1e5	1228
1	0.009	0.01	0.01	1e6	1229
4	0.09	0.005	0.1	10	1230
4	0.9	0.1	1e-5	10	1231
4	0.009	0.5	1e-5	100	1232
20	0.1	0.5	1e-4	1e5	1233
4	0.05	0.1	0.001	1e3	1234
1	0.5	0.09	0.1	1e6	1235
20	0.9	0.005	0.1	1e6	1236
4	0.09	0.09	0.01	1e6	1237
20	0.9	0.9	0.001	1e4	1238
20	0.05	0.009	1e-5	10	1239
1	0.01	0.9	1e-6	1e4	1240
1	0.01	0.009	1e-6	10	1241
1	0.09	0.009	1e-5	10	1242
20	0.5	0.001	0.1	1e3	1243
1	0.01	0.005	0.001	1e4	1244
4	0.001	0.9	1e-4	1e3	1245
20	0.09	0.5	0.001	1e5	1246
4	0.9	0.01	0.001	1e5	1247
20	0.001	0.5	1e-6	1e4	1248
1	0.05	0.009	1e-6	100	1249
4	0.01	0.1	0.1	1e3	1250
4	0.009	0.009	1e-5	1e5	1251
20	0.001	0.05	0.01	1e3	1252
20	0.1	0.009	0.1	100	1253
1	0.09	0.009	0.001	100	1254
4	0.09	0.5	1e-5	1e3	1255
4	0.001	0.01	1e-4	1e3	1256
20	0.09	0.09	1e-4	1e6	1257
4	0.05	0.5	0.01	1e6	1258
1	0.001	0.009	1e-5	1e6	1259
20	0.05	0.09	1e-4	1e5	1260
1	0.09	0.9	1e-6	1e5	1261
20	0.1	0.5	1e-6	1e3	1262
20	0.5	0.01	1e-5	1e5	1263
20	0.9	0.09	0.01	10	1264
20	0.005	0.1	1e-6	10	1265
1	0.09	0.5	0.1	1e5	1266
1	0.5	0.5	1e-6	1e5	1267
4	0.01	0.05	0.001	100	1268
20	0.09	0.01	0.01	1e5	1269
4	0.09	0.001	0.001	1e5	1270
4	0.01	0.01	1e-5	1e5	1271
20	0.05	0.009	1e-6	1e3	1272
4	0.009	0.005	1e-4	10	1273
1	0.9	0.9	0.1	1e6	1274
20	0.9	0.9	0.001	1e3	1275
20	0.09	0.05	0.01	10	1276
1	0.01	0.005	0.01	100	1277
20	0.01	0.05	1e-6	1e5	1278
4	0.01	0.1	0.1	1e5	1279
20	0.9	0.5	0.1	10	1280
20	0.005	0.5	0.1	1e3	1281
20	0.1	0.009	1e-5	1e5	1282
1	0.05	0.05	0.001	10	1283
4	0.009	0.9	1e-4	10	1284
20	0.5	0.09	1e-4	1e6	1285
4	0.1	0.1	0.1	1e3	1286
4	0.09	0.01	0.1	100	1287
20	0.009	0.009	0.001	100	1288
20	0.001	0.05	1e-4	100	1289
1	0.05	0.9	0.001	100	1290
4	0.001	0.1	1e-4	1e5	1291
20	0.1	0.9	0.001	1e6	1292
1	0.01	0.009	0.1	1e6	1293
20	0.001	0.9	1e-5	1e5	1294
1	0.1	0.01	0.001	1e4	1295
20	0.009	0.009	1e-4	1e6	1296
1	0.5	0.09	0.01	1e5	1297
4	0.009	0.05	1e-5	1e3	1298
4	0.01	0.01	0.1	1e5	1299
4	0.01	0.01	1e-6	1e3	1300
1	0.1	0.09	0.1	100	1301
4	0.001	0.05	1e-5	1e6	1302
1	0.5	0.001	1e-4	1e4	1303
4	0.009	0.9	0.1	100	1304
20	0.09	0.05	1e-5	1e4	1305
20	0.01	0.001	1e-4	1e6	1306
4	0.1	0.1	0.1	1e3	1307
4	0.005	0.9	1e-4	1e6	1308
20	0.01	0.05	0.1	10	1309
20	0.01	0.01	1e-6	10	1310
20	0.005	0.001	0.01	1e4	1311
4	0.001	0.1	0.01	100	1312
4	0.5	0.001	1e-5	1e6	1313
20	0.009	0.01	0.01	100	1314
4	0.1	0.09	1e-6	1e5	1315
20	0.09	0.09	0.1	1e6	1316
4	0.1	0.009	0.1	100	1317
20	0.01	0.05	1e-6	10	1318
20	0.009	0.009	0.001	1e5	1319
20	0.9	0.01	1e-6	1e4	1320
20	0.009	0.5	0.001	10	1321
20	0.1	0.5	0.1	10	1322
1	0.01	0.09	1e-4	1e5	1323
1	0.9	0.1	1e-6	1e5	1324
4	0.09	0.9	1e-5	100	1325
4	0.9	0.9	0.1	10	1326
20	0.9	0.1	1e-6	1e5	1327
20	0.05	0.005	0.01	100	1328
4	0.01	0.9	1e-6	10	1329
1	0.01	0.005	1e-6	1e4	1330
4	0.001	0.009	0.001	1e5	1331
4	0.009	0.05	1e-5	1e6	1332
20	0.09	0.5	1e-4	1e3	1333
20	0.09	0.05	1e-4	1e3	1334
4	0.1	0.09	1e-6	1e5	1335
4	0.05	0.009	1e-5	10	1336
20	0.001	0.09	0.01	1e4	1337
20	0.1	0.5	0.001	1e4	1338
20	0.05	0.1	1e-5	1e6	1339
1	0.005	0.09	1e-6	1e5	1340
1	0.1	0.1	0.001	10	1341
4	0.1	0.001	0.001	1e3	1342
4	0.05	0.009	0.001	10	1343
4	0.1	0.001	1e-5	1e6	1344
20	0.001	0.5	0.01	1e3	1345
4	0.1	0.005	1e-5	1e3	1346
4	0.5	0.009	0.1	1e3	1347
1	0.09	0.1	1e-5	1e3	1348
1	0.05	0.1	0.001	100	1349
1	0.009	0.9	1e-5	1e3	1350
1	0.001	0.09	0.001	100	1351
20	0.5	0.009	0.1	1e5	1352
4	0.05	0.09	0.01	10	1353
1	0.009	0.09	0.001	100	1354
20	0.01	0.005	1e-5	10	1355
20	0.001	0.001	1e-5	10	1356
1	0.001	0.05	1e-4	100	1357
20	0.05	0.01	0.01	1e5	1358
4	0.9	0.005	1e-5	1e5	1359
1	0.1	0.01	0.001	1e6	1360
20	0.01	0.009	0.01	1e4	1361
20	0.9	0.005	1e-5	1e4	1362
20	0.5	0.5	0.01	10	1363
1	0.009	0.5	0.1	1e6	1364
20	0.005	0.01	0.001	1e6	1365
4	0.09	0.009	1e-4	100	1366
4	0.005	0.005	1e-4	1e5	1367
4	0.001	0.1	1e-5	1e5	1368
1	0.009	0.01	1e-5	1e4	1369
1	0.009	0.5	0.1	100	1370
1	0.05	0.009	1e-6	10	1371
4	0.009	0.1	1e-4	1e4	1372
20	0.01	0.001	0.01	1e4	1373
20	0.09	0.9	1e-6	100	1374
20	0.001	0.1	1e-6	1e6	1375
20	0.001	0.01	0.1	10	1376
1	0.005	0.005	1e-5	100	1377
1	0.005	0.001	1e-5	100	1378
4	0.1	0.009	0.1	100	1379
4	0.1	0.009	1e-6	1e5	1380
4	0.009	0.5	1e-4	1e4	1381
4	0.9	0.005	0.001	1e6	1382
20	0.009	0.5	1e-6	1e6	1383
4	0.9	0.009	0.01	1e5	1384
4	0.001	0.5	0.01	1e4	1385
1	0.009	0.09	1e-6	10	1386
4	0.009	0.5	0.1	1e6	1387
20	0.9	0.005	0.1	1e4	1388
4	0.001	0.05	1e-4	1e4	1389
4	0.9	0.01	1e-5	10	1390
1	0.5	0.05	0.1	10	1391
20	0.005	0.05	0.001	100	1392
20	0.005	0.01	1e-4	100	1393
1	0.09	0.5	0.1	1e4	1394
4	0.05	0.001	1e-4	1e6	1395
20	0.005	0.001	1e-6	1e6	1396
1	0.1	0.1	0.01	1e3	1397
1	0.001	0.01	0.01	10	1398
4	0.01	0.001	0.01	1e6	1399
20	0.5	0.01	1e-4	100	1400
20	0.009	0.05	0.1	100	1401
20	0.005	0.009	1e-5	100	1402
4	0.9	0.005	0.001	1e4	1403
1	0.9	0.001	0.001	1e3	1404
4	0.01	0.1	0.1	100	1405
4	0.009	0.1	1e-6	1e6	1406
4	0.01	0.09	0.1	1e5	1407
20	0.01	0.1	0.01	10	1408
1	0.005	0.001	1e-4	1e4	1409
4	0.5	0.09	0.01	1e6	1410
4	0.009	0.9	0.001	1e6	1411
20	0.09	0.009	0.01	1e6	1412
4	0.9	0.9	0.1	1e6	1413
20	0.5	0.01	1e-4	1e3	1414
4	0.005	0.01	1e-6	1e4	1415
20	0.9	0.05	1e-5	1e3	1416
1	0.05	0.1	1e-6	10	1417
1	0.09	0.09	0.001	1e3	1418
20	0.5	0.9	1e-5	1e3	1419
20	0.1	0.009	0.001	1e4	1420
1	0.1	0.1	1e-5	1e6	1421
4	0.01	0.1	1e-4	10	1422
4	0.05	0.005	0.1	1e5	1423
1	0.5	0.05	1e-6	10	1424
20	0.5	0.005	1e-5	1e3	1425
4	0.05	0.5	0.1	1e4	1426
1	0.001	0.001	0.01	100	1427
4	0.1	0.01	0.1	1e4	1428
1	0.09	0.05	0.1	1e5	1429
20	0.009	0.9	0.1	10	1430
4	0.005	0.9	1e-6	1e3	1431
1	0.01	0.001	1e-5	10	1432
4	0.005	0.9	0.1	1e4	1433
1	0.05	0.5	1e-6	100	1434
1	0.1	0.01	0.01	1e3	1435
4	0.001	0.1	0.001	1e5	1436
4	0.5	0.5	0.1	1e6	1437
1	0.005	0.1	0.01	1e5	1438
4	0.09	0.005	0.1	1e3	1439
20	0.09	0.5	0.001	1e3	1440
1	0.01	0.5	0.001	1e3	1441
4	0.5	0.005	0.001	1e5	1442
1	0.5	0.009	0.001	1e3	1443
20	0.005	0.009	0.001	100	1444
20	0.01	0.001	1e-4	1e6	1445
1	0.005	0.09	1e-5	1e6	1446
1	0.09	0.01	1e-4	1e5	1447
1	0.005	0.01	1e-6	1e3	1448
1	0.1	0.01	0.1	1e4	1449
1	0.9	0.9	1e-5	1e5	1450
20	0.009	0.09	1e-4	10	1451
20	0.09	0.09	1e-6	1e4	1452
4	0.9	0.1	1e-4	1e6	1453
4	0.001	0.01	0.1	100	1454
1	0.009	0.009	1e-6	1e6	1455
20	0.9	0.001	1e-5	1e3	1456
20	0.09	0.9	0.01	1e4	1457
20	0.1	0.09	1e-4	1e3	1458
20	0.5	0.005	0.1	1e5	1459
20	0.9	0.9	0.001	1e4	1460
20	0.09	0.1	0.001	100	1461
4	0.009	0.1	0.01	1e5	1462
1	0.001	0.01	0.1	1e5	1463
1	0.005	0.05	1e-6	1e3	1464
1	0.5	0.005	0.01	100	1465
1	0.05	0.009	1e-4	1e6	1466
4	0.001	0.09	0.01	1e3	1467
1	0.001	0.005	1e-6	1e5	1468
1	0.05	0.01	1e-4	1e4	1469
1	0.05	0.05	1e-4	100	1470
4	0.09	0.001	1e-6	10	1471
20	0.05	0.005	1e-5	10	1472
4	0.001	0.01	0.1	100	1473
4	0.01	0.001	0.01	100	1474
4	0.05	0.05	1e-5	1e5	1475
4	0.009	0.5	0.1	10	1476
4	0.05	0.001	1e-4	1e6	1477
20	0.05	0.05	1e-4	1e3	1478
4	0.05	0.05	1e-5	1e4	1479
1	0.5	0.05	1e-4	10	1480
20	0.005	0.009	0.1	10	1481
1	0.1	0.9	0.001	10	1482
4	0.005	0.5	1e-5	10	1483
20	0.005	0.01	0.1	1e3	1484
1	0.009	0.09	0.001	1e6	1485
20	0.009	0.09	0.01	1e4	1486
4	0.005	0.001	1e-5	100	1487
1	0.5	0.5	1e-4	1e5	1488
4	0.005	0.09	0.1	1e6	1489
20	0.001	0.05	1e-4	10	1490
4	0.005	0.09	0.01	1e5	1491
4	0.05	0.9	1e-5	1e3	1492
20	0.005	0.01	1e-6	1e6	1493
1	0.001	0.01	1e-4	1e5	1494
20	0.01	0.001	0.1	1e4	1495
20	0.5	0.01	1e-4	10	1496
20	0.009	0.09	1e-4	1e4	1497
4	0.09	0.009	0.01	1e5	1498
20	0.05	0.005	1e-5	1e5	1499
20	0.9	0.9	0.001	1e3	1500
20	0.05	0.05	0.01	1e3	1501
1	0.09	0.009	0.1	100	1502
1	0.001	0.1	1e-4	10	1503
1	0.009	0.05	0.01	1e3	1504
1	0.5	0.05	1e-4	1e4	1505
1	0.09	0.09	1e-4	1e5	1506
1	0.009	0.05	0.1	100	1507
20	0.5	0.5	1e-5	1e3	1508
4	0.5	0.5	0.01	10	1509
20	0.001	0.009	1e-4	1e3	1510
4	0.001	0.01	1e-5	1e4	1511
20	0.9	0.005	1e-6	1e6	1512
20	0.09	0.1	0.1	1e4	1513
4	0.009	0.09	1e-6	1e6	1514
1	0.5	0.9	0.1	1e5	1515
4	0.05	0.001	0.001	100	1516
1	0.01	0.9	1e-4	1e6	1517
20	0.01	0.05	1e-4	1e5	1518
1	0.005	0.001	0.01	100	1519
1	0.09	0.5	0.001	10	1520
4	0.1	0.001	0.1	1e6	1521
20	0.05	0.9	1e-5	10	1522
1	0.05	0.1	1e-6	1e4	1523
20	0.05	0.005	1e-5	1e6	1524
20	0.01	0.05	0.001	1e6	1525
20	0.9	0.05	0.01	1e6	1526
20	0.9	0.1	0.001	1e4	1527
4	0.5	0.1	0.1	1e3	1528
4	0.001	0.009	1e-4	1e5	1529
1	0.01	0.09	0.1	1e5	1530
1	0.009	0.09	0.001	10	1531
4	0.009	0.005	0.001	1e5	1532
20	0.01	0.5	1e-5	100	1533
1	0.01	0.9	0.1	100	1534
20	0.09	0.09	1e-4	1e4	1535
4	0.1	0.9	1e-4	1e3	1536
20	0.05	0.01	0.01	100	1537
20	0.9	0.005	1e-4	1e5	1538
1	0.9	0.1	1e-4	1e3	1539
20	0.009	0.9	1e-5	1e5	1540
4	0.05	0.09	1e-4	1e3	1541
1	0.09	0.5	0.1	1e5	1542
20	0.9	0.001	0.1	1e3	1543
20	0.09	0.09	0.01	1e5	1544
4	0.1	0.9	0.01	1e6	1545
4	0.09	0.01	1e-4	1e4	1546
20	0.5	0.009	0.01	1e3	1547
4	0.009	0.9	0.01	1e5	1548
20	0.5	0.01	1e-4	100	1549
4	0.09	0.09	0.001	10	1550
1	0.009	0.5	0.01	100	1551
4	0.1	0.05	1e-5	10	1552
4	0.9	0.05	1e-5	10	1553
1	0.01	0.09	0.01	1e3	1554
1	0.5	0.9	1e-4	1e3	1555
4	0.5	0.5	0.01	100	1556
20	0.05	0.009	1e-6	1e4	1557
4	0.05	0.005	0.1	1e5	1558
1	0.1	0.1	0.01	1e5	1559
20	0.001	0.9	0.1	1e6	1560
4	0.9	0.9	0.1	100	1561
1	0.01	0.005	0.001	100	1562
20	0.05	0.5	0.1	1e5	1563
4	0.9	0.001	1e-5	1e4	1564
4	0.009	0.005	1e-5	10	1565
1	0.005	0.01	0.001	1e4	1566
20	0.005	0.009	1e-5	100	1567
4	0.5	0.09	0.01	1e3	1568
20	0.9	0.05	1e-5	100	1569
4	0.005	0.09	1e-4	100	1570
1	0.05	0.01	0.01	1e4	1571
4	0.001	0.05	0.1	1e6	1572
4	0.1	0.001	0.1	1e4	1573
1	0.01	0.009	1e-5	1e4	1574
4	0.001	0.9	0.1	100	1575
4	0.1	0.5	0.001	1e4	1576
4	0.09	0.005	1e-5	1e4	1577
4	0.01	0.1	0.01	1e4	1578
1	0.009	0.1	1e-4	1e6	1579
20	0.1	0.01	0.1	10	1580
1	0.009	0.05	0.1	100	1581
20	0.5	0.1	0.001	10	1582
4	0.009	0.05	0.1	10	1583
1	0.1	0.01	1e-6	1e4	1584
20	0.1	0.001	0.01	1e4	1585
20	0.05	0.1	1e-5	1e5	1586
20	0.01	0.05	0.01	1e4	1587
4	0.001	0.1	1e-5	1e5	1588
1	0.09	0.5	0.001	1e6	1589
20	0.09	0.05	1e-5	100	1590
4	0.5	0.001	0.01	1e6	1591
20	0.001	0.05	1e-6	1e5	1592
1	0.5	0.09	1e-5	1e6	1593
20	0.1	0.5	1e-4	1e5	1594
1	0.1	0.01	0.01	1e4	1595
1	0.005	0.1	0.01	1e5	1596
1	0.01	0.005	0.01	1e4	1597
4	0.009	0.05	0.1	100	1598
1	0.05	0.1	0.001	1e4	1599
4	0.5	0.09	1e-5	1e3	1600
1	0.05	0.1	0.01	10	1601
20	0.5	0.009	1e-5	1e6	1602
20	0.001	0.01	1e-6	1e6	1603
4	0.005	0.009	0.1	1e6	1604
4	0.01	0.1	0.1	10	1605
20	0.005	0.9	0.01	1e3	1606
1	0.005	0.9	0.01	1e3	1607
4	0.001	0.01	0.01	10	1608
20	0.01	0.5	1e-5	1e4	1609
4	0.005	0.01	0.1	10	1610
20	0.001	0.05	0.001	1e4	1611
20	0.05	0.01	1e-5	1e6	1612
1	0.001	0.001	1e-6	1e3	1613
1	0.05	0.09	0.1	1e5	1614
20	0.005	0.9	0.01	1e4	1615
4	0.1	0.09	1e-5	1e3	1616
20	0.9	0.09	1e-5	1e3	1617
1	0.9	0.05	0.01	100	1618
4	0.05	0.001	1e-6	100	1619
20	0.9	0.005	1e-6	100	1620
1	0.09	0.001	0.001	10	1621
4	0.01	0.09	1e-5	1e5	1622
1	0.001	0.009	0.01	1e4	1623
20	0.05	0.05	0.001	1e4	1624
1	0.005	0.005	0.1	1e3	1625
4	0.01	0.01	0.1	1e5	1626
1	0.001	0.1	1e-5	100	1627
4	0.5	0.009	1e-5	10	1628
1	0.01	0.009	0.1	1e4	1629
20	0.009	0.09	0.01	1e3	1630
1	0.5	0.05	0.1	10	1631
1	0.01	0.1	0.01	10	1632
20	0.1	0.01	0.001	1e5	1633
4	0.5	0.01	0.01	1e5	1634
1	0.9	0.05	1e-6	1e6	1635
4	0.9	0.5	1e-6	10	1636
20	0.009	0.05	1e-5	1e3	1637
4	0.1	0.9	1e-5	1e3	1638
4	0.009	0.01	0.01	1e4	1639
4	0.009	0.09	0.1	1e3	1640
4	0.001	0.09	0.001	10	1641
1	0.009	0.009	0.1	1e6	1642
20	0.09	0.5	1e-4	10	1643
1	0.1	0.9	1e-4	1e4	1644
1	0.01	0.001	0.001	1e6	1645
20	0.1	0.5	0.01	1e5	1646
1	0.005	0.5	0.1	10	1647
4	0.1	0.9	1e-5	1e6	1648
4	0.9	0.1	1e-6	10	1649
4	0.9	0.01	0.001	1e3	1650
20	0.01	0.09	1e-6	100	1651
20	0.05	0.1	0.01	1e3	1652
4	0.005	0.001	1e-4	100	1653
20	0.01	0.005	0.001	10	1654
4	0.9	0.05	1e-6	1e3	1655
4	0.5	0.09	1e-4	1e4	1656
1	0.1	0.005	1e-5	1e4	1657
4	0.09	0.005	1e-5	1e4	1658
4	0.5	0.005	0.01	1e3	1659
4	0.9	0.1	1e-5	1e3	1660
4	0.5	0.1	1e-5	1e3	1661
4	0.1	0.001	0.01	1e5	1662
4	0.05	0.001	0.1	10	1663
1	0.5	0.001	1e-4	1e4	1664
1	0.9	0.05	0.001	100	1665
20	0.1	0.1	1e-4	1e6	1666
1	0.5	0.005	0.001	1e4	1667
4	0.5	0.009	1e-4	1e6	1668
4	0.01	0.5	0.1	1e3	1669
4	0.5	0.01	1e-6	1e3	1670
4	0.1	0.01	0.01	10	1671
20	0.9	0.05	0.01	1e4	1672
20	0.5	0.001	1e-4	1e5	1673
1	0.01	0.1	0.1	1e3	1674
1	0.01	0.001	1e-6	1e6	1675
1	0.09	0.001	1e-4	100	1676
1	0.01	0.01	0.01	1e3	1677
20	0.9	0.9	1e-4	100	1678
1	0.005	0.01	0.01	100	1679
1	0.009	0.005	0.001	1e6	1680
4	0.09	0.9	1e-5	100	1681
4	0.009	0.05	1e-4	1e3	1682
20	0.9	0.9	0.01	100	1683
1	0.005	0.005	1e-5	1e5	1684
4	0.01	0.009	1e-6	1e3	1685
20	0.1	0.005	0.001	1e6	1686
20	0.9	0.5	1e-4	1e3	1687
4	0.009	0.5	0.01	1e6	1688
20	0.009	0.5	1e-6	10	1689
1	0.01	0.01	0.01	100	1690
1	0.001	0.5	1e-6	1e5	1691
1	0.05	0.9	1e-4	1e6	1692
20	0.01	0.5	0.1	10	1693
1	0.09	0.5	0.001	1e5	1694
20	0.09	0.09	0.01	10	1695
20	0.9	0.01	1e-4	100	1696
20	0.9	0.009	0.01	1e6	1697
1	0.01	0.1	0.1	1e6	1698
1	0.5	0.001	1e-6	100	1699
1	0.09	0.9	1e-6	1e5	1700
4	0.005	0.005	1e-4	100	1701
4	0.9	0.005	1e-6	1e3	1702
1	0.01	0.09	1e-4	1e5	1703
1	0.01	0.05	1e-4	1e6	1704
4	0.009	0.05	1e-6	1e6	1705
1	0.009	0.9	1e-4	1e5	1706
20	0.005	0.005	0.01	10	1707
4	0.09	0.001	1e-6	1e5	1708
1	0.005	0.005	1e-4	1e4	1709
1	0.5	0.009	1e-4	1e3	1710
4	0.001	0.5	0.01	1e4	1711
1	0.001	0.09	1e-4	100	1712
20	0.005	0.001	1e-5	1e5	1713
20	0.001	0.5	0.01	1e3	1714
1	0.9	0.009	0.01	1e4	1715
20	0.009	0.9	0.01	1e4	1716
1	0.1	0.5	0.1	1e3	1717
4	0.1	0.5	1e-4	100	1718
1	0.005	0.09	1e-5	1e3	1719
4	0.5	0.005	0.001	1e4	1720
4	0.05	0.5	0.001	1e4	1721
4	0.01	0.009	0.01	100	1722
4	0.05	0.9	0.001	100	1723
4	0.009	0.9	0.01	1e6	1724
20	0.1	0.05	1e-5	1e5	1725
4	0.1	0.09	0.001	10	1726
1	0.005	0.01	0.001	100	1727
20	0.5	0.09	1e-5	1e3	1728
1	0.001	0.09	1e-4	100	1729
20	0.009	0.005	1e-5	1e5	1730
1	0.5	0.5	0.001	100	1731
20	0.09	0.005	0.001	1e4	1732
20	0.5	0.009	1e-6	100	1733
4	0.009	0.009	0.01	1e4	1734
20	0.01	0.9	1e-6	10	1735
1	0.05	0.005	1e-6	1e6	1736
1	0.9	0.5	0.01	1e4	1737
1	0.9	0.05	1e-6	1e3	1738
4	0.009	0.9	0.1	1e5	1739
4	0.05	0.9	0.001	10	1740
4	0.1	0.005	1e-4	1e3	1741
4	0.1	0.05	1e-4	100	1742
20	0.001	0.9	0.1	1e3	1743
20	0.5	0.5	0.001	1e5	1744
4	0.9	0.9	0.01	100	1745
1	0.5	0.9	0.1	10	1746
4	0.05	0.09	0.01	1e5	1747
1	0.1	0.09	1e-4	1e3	1748
20	0.001	0.5	0.1	1e3	1749
1	0.001	0.01	1e-6	1e3	1750
20	0.1	0.01	1e-6	1e5	1751
20	0.005	0.009	0.01	1e3	1752
1	0.09	0.01	0.1	10	1753
20	0.05	0.09	1e-6	100	1754
20	0.9	0.01	1e-6	100	1755
1	0.005	0.09	1e-6	1e4	1756
1	0.09	0.005	0.01	100	1757
1	0.05	0.09	0.1	1e4	1758
4	0.5	0.01	1e-6	1e5	1759
1	0.01	0.1	1e-6	1e6	1760
1	0.05	0.09	0.001	1e4	1761
20	0.1	0.9	1e-4	1e4	1762
4	0.9	0.01	1e-6	100	1763
4	0.005	0.5	0.1	100	1764
1	0.009	0.001	0.1	100	1765
20	0.09	0.05	0.1	1e6	1766
1	0.009	0.9	1e-6	1e4	1767
20	0.005	0.9	1e-6	1e4	1768
1	0.01	0.09	1e-6	100	1769
4	0.001	0.9	1e-4	1e4	1770
1	0.5	0.9	1e-4	1e3	1771
4	0.9	0.01	0.001	1e3	1772
20	0.5	0.05	1e-6	1e5	1773
4	0.01	0.09	0.01	1e6	1774
4	0.01	0.1	0.1	1e3	1775
4	0.005	0.09	1e-4	10	1776
20	0.09	0.009	1e-5	1e3	1777
20	0.05	0.009	0.001	10	1778
1	0.9	0.005	1e-6	1e4	1779
4	0.9	0.01	0.01	1e3	1780
4	0.9	0.5	1e-4	1e3	1781
1	0.09	0.09	0.001	1e5	1782
4	0.9	0.9	1e-5	1e5	1783
1	0.1	0.05	0.1	1e6	1784
4	0.05	0.01	0.01	1e6	1785
4	0.005	0.05	1e-6	100	1786
1	0.9	0.1	0.01	1e3	1787
4	0.009	0.001	0.1	1e5	1788
20	0.01	0.1	1e-5	1e5	1789
1	0.01	0.09	0.01	10	1790
20	0.009	0.005	0.001	1e3	1791
20	0.009	0.9	1e-5	1e5	1792
20	0.1	0.9	0.1	1e6	1793
20	0.009	0.1	0.01	1e5	1794
20	0.05	0.01	1e-4	1e6	1795
4	0.9	0.001	1e-4	1e3	1796
4	0.009	0.009	0.001	1e4	1797
20	0.05	0.01	0.1	100	1798
4	0.05	0.5	1e-6	1e5	1799
1	0.05	0.001	1e-6	100	1800
4	0.005	0.09	1e-6	10	1801
4	0.5	0.01	0.01	100	1802
4	0.05	0.01	1e-4	1e5	1803
20	0.001	0.09	1e-5	1e6	1804
4	0.09	0.05	0.001	1e3	1805
1	0.01	0.9	0.001	1e5	1806
1	0.9	0.001	1e-4	1e3	1807
20	0.01	0.001	0.1	1e5	1808
4	0.5	0.001	0.1	1e3	1809
4	0.005	0.005	1e-6	10	1810
4	0.09	0.09	1e-4	1e3	1811
4	0.09	0.9	1e-6	1e4	1812
1	0.9	0.001	1e-6	1e6	1813
1	0.01	0.9	1e-4	1e4	1814
1	0.009	0.001	1e-4	100	1815
1	0.01	0.009	1e-4	10	1816
4	0.05	0.09	0.01	1e5	1817
1	0.001	0.09	1e-4	1e6	1818
1	0.005	0.09	1e-6	100	1819
20	0.01	0.1	1e-4	1e6	1820
20	0.09	0.1	0.1	1e5	1821
20	0.009	0.009	0.001	1e5	1822
20	0.005	0.1	0.01	10	1823
1	0.09	0.09	1e-4	1e3	1824
1	0.09	0.01	1e-4	10	1825
4	0.005	0.1	1e-5	1e4	1826
4	0.01	0.1	0.1	1e5	1827
4	0.1	0.009	0.001	1e4	1828
4	0.09	0.005	0.01	1e6	1829
4	0.09	0.1	1e-5	1e6	1830
1	0.001	0.5	0.1	1e6	1831
20	0.009	0.005	0.001	1e6	1832
1	0.9	0.09	0.01	1e4	1833
20	0.001	0.005	1e-4	1e6	1834
20	0.009	0.1	0.001	1e3	1835
20	0.001	0.1	0.1	1e5	1836
1	0.009	0.01	0.1	1e5	1837
20	0.01	0.5	1e-5	100	1838
1	0.005	0.09	1e-6	1e4	1839
1	0.1	0.005	1e-6	1e6	1840
1	0.1	0.09	1e-4	1e5	1841
4	0.01	0.9	0.1	1e6	1842
20	0.05	0.001	0.01	100	1843
4	0.5	0.1	0.1	1e6	1844
4	0.005	0.001	0.1	1e4	1845
1	0.009	0.1	0.001	1e5	1846
20	0.01	0.1	0.1	1e4	1847
4	0.5	0.01	1e-5	1e3	1848
20	0.01	0.05	0.01	1e3	1849
4	0.001	0.5	0.01	1e5	1850
4	0.5	0.001	0.01	1e3	1851
4	0.9	0.1	0.001	1e6	1852
1	0.5	0.009	1e-5	100	1853
20	0.9	0.5	0.01	1e4	1854
4	0.5	0.05	0.01	1e3	1855
20	0.09	0.001	1e-4	1e4	1856
4	0.09	0.005	1e-4	1e5	1857
4	0.09	0.01	0.001	1e3	1858
20	0.01	0.005	0.1	1e4	1859
4	0.005	0.1	1e-6	1e3	1860
1	0.001	0.009	1e-6	1e6	1861
20	0.001	0.9	0.001	100	1862
4	0.01	0.001	1e-4	1e5	1863
4	0.009	0.9	0.01	100	1864
20	0.05	0.9	0.01	1e6	1865
20	0.09	0.05	0.01	100	1866
1	0.1	0.09	0.1	1e5	1867
1	0.01	0.001	0.01	1e6	1868
4	0.01	0.009	0.1	10	1869
1	0.5	0.05	1e-6	100	1870
20	0.005	0.001	1e-5	1e6	1871
4	0.05	0.05	1e-6	100	1872
4	0.05	0.009	0.1	10	1873
4	0.009	0.001	1e-4	1e6	1874
1	0.05	0.09	1e-6	100	1875
1	0.09	0.1	0.001	1e6	1876
4	0.01	0.1	1e-6	1e6	1877
4	0.1	0.001	0.001	1e3	1878
4	0.9	0.1	0.1	100	1879
1	0.009	0.01	1e-5	1e5	1880
1	0.005	0.01	0.01	10	1881
4	0.009	0.9	1e-4	1e6	1882
4	0.005	0.01	0.001	10	1883
20	0.1	0.1	0.01	1e3	1884
4	0.09	0.05	1e-5	100	1885
20	0.9	0.05	1e-6	1e3	1886
1	0.09	0.09	0.001	1e6	1887
20	0.9	0.05	1e-6	1e6	1888
1	0.001	0.09	0.01	1e3	1889
20	0.001	0.9	1e-4	1e3	1890
4	0.001	0.09	1e-4	1e3	1891
4	0.5	0.9	1e-4	1e4	1892
1	0.05	0.001	1e-4	1e3	1893
4	0.5	0.05	0.001	1e6	1894
20	0.001	0.9	1e-4	1e6	1895
20	0.05	0.01	0.001	10	1896
1	0.1	0.01	0.01	1e3	1897
1	0.009	0.01	1e-4	1e4	1898
1	0.09	0.05	1e-6	1e5	1899
20	0.05	0.009	1e-4	1e5	1900
1	0.5	0.05	0.001	1e4	1901
1	0.9	0.9	0.1	100	1902
20	0.09	0.09	1e-5	10	1903
1	0.5	0.5	1e-4	1e4	1904
4	0.005	0.01	1e-6	100	1905
1	0.009	0.01	1e-4	1e6	1906
1	0.09	0.009	0.01	1e6	1907
1	0.9	0.09	0.01	100	1908
20	0.9	0.01	1e-6	1e4	1909
4	0.001	0.1	1e-5	10	1910
4	0.005	0.1	1e-6	1e4	1911
4	0.1	0.05	1e-5	10	1912
20	0.01	0.009	0.001	1e6	1913
1	0.01	0.1	1e-5	1e3	1914
20	0.001	0.05	1e-6	1e3	1915
4	0.009	0.009	1e-6	1e5	1916
4	0.05	0.05	0.1	100	1917
4	0.01	0.009	0.001	10	1918
20	0.1	0.009	0.1	1e6	1919
1	0.001	0.05	1e-5	1e3	1920
1	0.005	0.05	1e-6	1e6	1921
1	0.05	0.5	1e-6	1e5	1922
20	0.09	0.1	0.01	1e6	1923
20	0.05	0.09	0.01	100	1924
1	0.009	0.09	1e-6	100	1925
20	0.005	0.9	0.01	1e3	1926
1	0.009	0.1	1e-5	10	1927
1	0.001	0.1	1e-5	1e5	1928
1	0.05	0.01	1e-6	1e4	1929
1	0.009	0.01	0.1	1e6	1930
4	0.9	0.05	1e-6	10	1931
4	0.5	0.1	0.1	100	1932
1	0.005	0.9	0.001	1e6	1933
4	0.01	0.09	0.001	1e5	1934
20	0.1	0.9	0.1	1e3	1935
1	0.05	0.9	0.1	10	1936
4	0.09	0.05	0.001	10	1937
1	0.9	0.05	0.01	100	1938
20	0.9	0.5	0.01	1e6	1939
1	0.009	0.05	1e-6	10	1940
20	0.005	0.001	1e-5	10	1941
4	0.1	0.01	0.001	1e3	1942
1	0.5	0.05	0.1	100	1943
20	0.001	0.05	1e-6	1e5	1944
20	0.05	0.9	0.01	1e3	1945
1	0.5	0.001	1e-5	1e5	1946
4	0.09	0.005	1e-4	10	1947
20	0.09	0.01	1e-5	1e3	1948
1	0.09	0.1	0.1	1e3	1949
1	0.05	0.01	0.01	1e6	1950
1	0.001	0.005	1e-4	100	1951
1	0.001	0.009	1e-5	1e4	1952
1	0.01	0.009	1e-4	1e6	1953
1	0.09	0.9	0.001	1e4	1954
4	0.005	0.9	1e-5	1e4	1955
4	0.05	0.5	1e-6	1e3	1956
1	0.09	0.5	1e-5	1e6	1957
1	0.005	0.5	1e-4	1e4	1958
4	0.5	0.05	1e-4	1e4	1959
1	0.01	0.1	1e-5	1e4	1960
20	0.05	0.1	1e-4	1e6	1961
20	0.9	0.9	1e-6	1e5	1962
1	0.001	0.05	0.001	1e6	1963
4	0.009	0.005	0.1	1e4	1964
4	0.001	0.01	1e-5	100	1965
1	0.01	0.09	1e-6	10	1966
1	0.1	0.001	0.01	1e5	1967
1	0.009	0.9	0.001	1e6	1968
4	0.001	0.1	0.01	1e4	1969
4	0.9	0.9	0.001	10	1970
20	0.5	0.1	1e-6	1e4	1971
20	0.001	0.09	0.01	1e3	1972
1	0.9	0.001	1e-4	10	1973
20	0.1	0.09	1e-4	1e3	1974
20	0.09	0.1	1e-5	100	1975
1	0.5	0.09	0.001	100	1976
1	0.05	0.09	0.001	1e5	1977
20	0.5	0.09	1e-4	1e5	1978
20	0.005	0.1	1e-5	1e5	1979
1	0.05	0.09	1e-4	100	1980
20	0.05	0.009	0.1	1e6	1981
20	0.1	0.005	1e-6	1e3	1982
1	0.009	0.05	1e-5	100	1983
4	0.005	0.05	1e-5	1e6	1984
1	0.005	0.5	0.001	1e5	1985
20	0.05	0.05	1e-5	1e5	1986
20	0.009	0.005	1e-5	1e4	1987
20	0.09	0.009	1e-5	100	1988
1	0.9	0.1	1e-5	1e4	1989
4	0.05	0.005	1e-4	10	1990
1	0.1	0.1	0.1	1e3	1991
4	0.01	0.01	0.01	10	1992
20	0.005	0.001	0.1	10	1993
4	0.1	0.9	0.001	10	1994
20	0.09	0.09	0.01	1e3	1995
20	0.009	0.5	0.01	100	1996
4	0.01	0.009	1e-5	100	1997
4	0.009	0.001	0.001	1e4	1998
20	0.001	0.1	0.001	1e3	1999
[truncated: 8,001 more rows]
